# Supplementary material for: Interlocked DNA Nanojoints for Reversible Thermal Sensing
Source: PubMed Central journal article supplement — Angew Chem Int Ed Engl. 2020 Jul 1;59(30):12455–9. doi: 10.1002/anie.202003991 (PMC7384075; doi:10.1002/anie.202003991), 2020-07-01
Supplement: ANIE-59-12455-s001.pdf [file ANIE-59-12455-s001.pdf]

Supporting Information

**Interlocked DNA Nanojoints for Reversible Thermal Sensing**

*Yinzhou Ma<sup>+</sup>, Mathias Centola<sup>+</sup>, Daniel Keppner, and Michael Famulok\**

anie\_202003991\_sm\_miscellaneous\_information.pdf

# Supporting Information

## 1. Experimental

### 1.1 Materials

All oligodeoxynucleotides (ODNs) were purchased from Microsynth AG and dissolved in ddH<sub>2</sub>O. The concentration of each oligo was measured with a Nanodrop 2000 (Thermo Scientific™).

#### Buffer solutions used in experiments

1x TAE buffer: 40 mM Tris, 20 mM AcOH, 1 mM EDTA.

1x ligase buffer: 40 mM Tris-HCl, 10 mM DTT, 5 mM ATP at pH 7.8

1x DNA Catenane buffer (DC buffer): 10 mM Tris-Cl, 1 mM EDTA, 25 mM MgCl<sub>2</sub> (pH 8.0).

1x DNA Catenane buffer with HEPES (HEPES Buffer): 10 mM HEPES, 1 mM EDTA, 25 mM MgCl<sub>2</sub> (pH 8.0)

WAX buffer A: 20 mM Tris-HCl at pH 9.0

WAX buffer B: 20 mM Tris-HCl, 1 M NaCl at pH 9.0

### 1.2 Assembly of the hybridized [2]catenane (Cat<sup>hyb</sup>)

#### 1.2.1 Assembly of the threaded Ring A

The ODNs (0.2 nmol each) used for the assembly of the threaded Ring A (for design and sequences see Figure S1 and Table S2) and NaCl (20 μmol) were mixed in 1x ligase buffer (total volume 200 μL). The solution was annealed in a temperature gradient from 90 °C to 15 °C at a rate of -1 °C/min.

#### 1.2.2 Assembly of the Cat<sup>hyb</sup>

To complete the catenane assembly, the ODNs (0.2 nmol each) for the assembly of Ring B (see Figure S1 and Table S2) are added into the solution of threaded Ring A and carefully mixed with a pipette. The solution was incubated at 15 °C for at least 4h, then 2 μL T4 DNA ligase (5 U/μl, Thermo Scientific) were added and the solution was incubated at 15 °C for at least 4h.

#### 1.2.3 Conversion of the Cat<sup>hyb</sup> to the mechanically interlocked DNA [2]catenane (Cat<sup>mec</sup>)

To convert the hybridized catenane to the mechanically interlocked catenane, 0.5 nmol of the corresponding Release ODN (R-ODN, see Table S3) were added into the solution of the Cat<sup>hyb</sup>; the ratio of R-ODN to the Cat<sup>hyb</sup> was 5:2. The solution was carefully mixed with a pipette and incubated at 15 °C for at least 4h. After incubation, the Cat<sup>mec</sup> was purified by HPLC (See 1.3 HPLC Purification).

#### 1.2.4 Conversion of the Cat<sup>mec</sup> to the Cat<sup>hyb</sup>

After the purification by HPLC, the concentration of the Cat<sup>mec</sup> was measured by

Nanodrop 2000 (Thermo Scientific™). To revert the catenane back to its hybridizing state, the corresponding Reverse ODN (RR-ODN, see Table S3) was added into the purified solution of the Cat<sup>mec</sup>; the ratio of RR-ODN to the Cat<sup>mec</sup> was 5:2. The solution was carefully mixed with a pipette and incubated at 15 °C for at least 4h.

### 1.3 Assembly of dsDNA rings

#### 1.3.1 Assembly of the Ring A

The ODNs (0.2 nmol each) used for the assembly of the Ring A (for design and sequences see Figure S1 and Table S4) and NaCl (20 μmol) were mixed in 1x ligase buffer (total volume 200 μL). The solution was annealed in a temperature gradient from 90 °C to 15 °C at a rate of -1 °C/min. Then 2 μL T4 DNA ligase (5 U/μL, Thermo Scientific) were added and the solution was incubated at 15 °C for at least 4h.

#### 1.3.2 Assembly of the Ring B

The ODNs (0.2 nmol each) used for the assembly of the Ring B (for design and sequences see Figure S1 and Table S4) and NaCl (20 μmol) were mixed in 1x ligase buffer (total volume 200 μL). The solution was annealed in a temperature gradient from 90 °C to 15 °C at a rate of -1 °C/min. Then 2 μL T4 DNA ligase (5 U/μL, Thermo Scientific) were added and the solution was incubated at 15 °C for at least 4h.

#### 1.3.3 Purification

The samples were purified by using an Amicon Ultra-0.5 mL centrifugal filter devices (YM-30, Millipore), and washed twice with 1x DC buffer. Concentrations were measured with a Nanodrop 2000 (Thermo Scientific™).

### 1.4 HPLC Purification

The HPLC purification was performed by a weak anion exchange, HPLC column (TSKgel DEAE-NPR 4.6 mm x 35 mm, TOSOH). The gradient elution program is listed in Table S1:

| Time | WAXA | WAXB  | Flow speed |
|------|------|-------|------------|
| 0.0  | 80 % | 20 %  | 0.4 ml/min |
| 0.1  | 50 % | 50 %  | 0.4 ml/min |
| 20.1 | 35 % | 65 %  | 0.4 ml/min |
| 21.0 | 0 %  | 100 % | 0.4 ml/min |
| 24.0 | 0 %  | 100 % | 0.4 ml/min |
| 25.0 | 80 % | 20 %  | 0.4 ml/min |

**Table S1.** The gradient elution program used for HPLC purification

After purification, the different fractions were concentrated by using an Amicon Ultra-0.5 mL centrifugal filter devices (YM-30, Millipore), and washed twice with 1x DC buffer. Concentrations were measured with a Nanodrop 2000 (Thermo Scientific™).

### 1.5 Fluorescence Detection

All fluorescence detections were performed by an iQ5 Multicolor Real Time PCR Detection System (Bio-Rad).

### **1.5.1 Thermal conversion of Cat<sup>hyb</sup> to Cat<sup>mec</sup>**

The PCR was programmed to start with the sample equilibrated at 24 °C and then to run a temperature gradient from 24 °C to 70 °C at rate of 0.5 °C/min. During the temperature increase, the fluorescence intensity was measured every minute.

### **1.5.2 Conversion of Cat<sup>mec</sup> to Cat<sup>hyb</sup>**

To test the reversibility of the mechanically interlocked catenane into the hybridized version, the samples were incubated at 65 °C for 5 min, to allow the Cat<sup>hyb</sup> to convert into the Cat<sup>mec</sup>, then the samples were cooled to 24 °C at rate of -3 °C/s and incubated at 24 °C for 1h. After the sample was cooled to 24 °C the fluorescence intensity was measured every 30 seconds in 2 hours.

### **1.5.3 Thermal reversibility of the Cat<sup>hyb</sup>**

For the temperature cycle experiments the PCR program contains the following steps:

- 1) incubation of the sample at 42 °C for 20 mins, allowing the Cat<sup>mec</sup> to convert into the Cat<sup>hyb</sup>;
- 2) measurement of fluorescence intensity;
- 3) heating of the sample from 42 °C to 60 °C at rate of 3 °C/s;
- 4) incubation of the sample at 60 °C for 5 mins, allowing the Cat<sup>hyb</sup> to convert into the Cat<sup>mec</sup>;
- 5) measurement of the fluorescence intensity;
- 6) cooling the sample down to 24 °C at rate of -3 °C/s.
- 7) returning to step 1 and repeating for 10 times

| Threaded Ring A                                             |                                                                                               |
|-------------------------------------------------------------|-----------------------------------------------------------------------------------------------|
| R4B2                                                        | 5'-phos-<br>CGTTTTTACCGCTTTTTGATACGTGCGGAACCCTGCGGGTGTTCTTTTTCGCGCTTTTTCCG-3'                 |
| RC1-BHQ                                                     | 5'-ATCAAAAAGCGGTAAAAACGCAAAAACCTGGCAAAAACGTA-BHQ1-3'                                          |
| RC1-BHQ2<br>(substitute to<br>RC1-BHQ to<br>label with HEX) | 5'-ATCAAAAAGCGGTAAAAACGCAAAAACCTGGCAAAAACGTA-BHQ2-3'                                          |
| RC2                                                         | 5'-GCCAAAAGACGGAAAAAGGAGCCGAAAAAGCGCGAAAAAAGA-3'                                              |
| R63-                                                        | G7T2 5'-phos-<br>GCTCCTTTTTCCGTCTTTTTGGCACTTTTTT <b>CGCAGAGCC</b> TTACGTTTTTTGCCAGTTTTTG-3'   |
|                                                             | G9 5'-phos-<br>GCTCCTTTTTCCGTCTTTTTGGCACTTTTTT <b>CGCCGGGCC</b> TTACGTTTTTTGCCAGTTTTTG-3'     |
|                                                             | G5T5 5'-phos-<br>GCTCCTTTTTCCGTCTTTTTGGCACTTTTTT <b>AAAAGCGCC</b> TTACGTTTTTTGCCAGTTTTTG-3'   |
|                                                             | G7T3 5'-phos-<br>GCTCCTTTTTCCGTCTTTTTGGCACTTTTTT <b>CCTGCTGCTC</b> TTACGTTTTTTGCCAGTTTTTG-3'  |
| R1RM-                                                       | G7T2 5'-phos-<br>TTCTTTCTAGCTGCATTCCACTT <b>GGCTCTGCG</b> TTGACCTTAGAACTGTATGGATATATTCTAC-3'  |
|                                                             | G9 5'-phos-<br>TTCTTTCTAGCTGCATTCCACTT <b>GGCCGGCG</b> TTGACCTTAGAACTGTATGGATATATTCTAC-3'     |
|                                                             | G5T5 5'-phos-<br>TTCTTTCTAGCTGCATTCCACTT <b>GGCGCTTTTT</b> TTGACCTTAGAACTGTATGGATATATTCTAC-3' |
|                                                             | G7T3 5'-phos-<br>TTCTTTCTAGCTGCATTCCACTT <b>GAGCAGCAGG</b> TTGACCTTAGAACTGTATGGATATATTCTAC-3' |
| The remaining ODNs of Ring B                                |                                                                                               |
| rm-1                                                        | 5'-GGTTTGTAAGACGGAATAATGTAGAATATATCCATACAGTTCTAAGGTCA-3'                                      |
| FAM-rm2                                                     | 5'-Fam-AGTGAATGCAGCTAGAAAGAATCAAGATCATAGTCAATCTCTCAGAGACGT-3'                                 |
| HEX-rm2<br>(substitute to<br>FAM-rm2 to label<br>with HEX)  | 5'-HEX-AGTGAATGCAGCTAGAAAGAATCAAGATCATAGTCAATCTCTCAGAGACGT-3'                                 |
| RMR2-                                                       | G7T2 5'-phos-<br>ATTATCCGTCTTACAAACCTAT <b>GGCGCTTTTT</b> TCGTCTCTGAGAGATTGACTATGATCTTGA-3'   |
|                                                             | G9 5'-phos-<br>ATTATCCGTCTTACAAACCTAT <b>GGCGCTTTTT</b> TCGTCTCTGAGAGATTGACTATGATCTTGA-3'     |
|                                                             | G5T5 5'-phos-<br>ATTATCCGTCTTACAAACCTAT <b>GGCCGGCGT</b> TACGTCTCTGAGAGATTGACTATGATCTTGA-3'   |
|                                                             | G7T3 5'-phos-<br>ATTATCCGTCTTACAAACCTAT <b>GGCCGGCGT</b> TACGTCTCTGAGAGATTGACTATGATCTTGA-3'   |

**Table S2.** Sequences of ODNs used for Cat<sup>hyb</sup>. The sequences of ss-region a1 are colored in red, and the sequences of ss-region b1 are colored in blue. The sequences of ss-region b2 are colored in green.

| R-ODNs                       |                                                               |                                   |
|------------------------------|---------------------------------------------------------------|-----------------------------------|
| For Cat <sup>hyb</sup> -G7T2 | RnG7T2                                                        | 5'-GGCTCTGCGAAAAAAAGTCCGATATA-3'  |
| For Cat <sup>hyb</sup> -G9   | RnG9                                                          | 5'-GGCCCGCGAAAAAAAGTCCGATATA-3'   |
| For Cat <sup>hyb</sup> -G5T5 | RnG5T5                                                        | 5'-GGCGCTTTTTAAAAAAAGTCCGATATA-3' |
| For Cat <sup>hyb</sup> -G7T3 | RnG7T3                                                        | 5'-GAGCAGCAGGAAAAAAAGTCCGATATA-3' |
| RR-ODNs                      |                                                               |                                   |
| For Cat <sup>hyb</sup> -G7T2 | RRnG7T2                                                       | 5'-TATATCGGACTTTTTTCGCGG-3'       |
| For Cat <sup>hyb</sup> -G9   | RRnG9                                                         | 5'-TATATCGGACTTTTTTCGCGG-3'       |
| For Cat <sup>hyb</sup> -G5T5 | RRnG5T5                                                       | 5'-TATATCGGACTTTTTTAAAAAG-3'      |
| For Cat <sup>hyb</sup> -G7T3 | RRnG7T3                                                       | 5'-TATATCGGACTTTTTTCCTGC-3'       |
| Negative control             |                                                               |                                   |
| FAM-control-1                | TTGATTCTTTCTAGCTGCATTCCACTGGCTCTGCGTTGACCTTAGAACTG            |                                   |
| Control-BHQ-2                | CAGTTCTAAGGTCAACGCAGAGCCTACGTTTTTTGCCAGTTTTTTCGCTT            |                                   |
| RC1-BHQ                      | 5'-ATCAAAAAGCGGTAAAAACGCAAAAAGTGGCAAAAACGTA-BHQ1-3'           |                                   |
| FAM-rm2                      | 5'-Fam-AGTGAATGCAGCTAGAAAGAATCAAGATCATAGTCAATCTCTCAGAGACGT-3' |                                   |

**Table S3.** Sequences of releasing ODNs, reversing ODNs and the negative control.

| Ring A                                                     |      |                                                                                          |
|------------------------------------------------------------|------|------------------------------------------------------------------------------------------|
| R4B2                                                       |      | 5'-phos-<br>CGTTTTTACCGCTTTTTGATACGTGCGGAACCCGCGGGTGTCTTTTTTCGCGCTTTTTCCG-3'             |
| RC1-BHQ                                                    |      | 5'-ATCAAAAAGCGGTAAAAACGCAAAAACGCAAAAACGTA-BHQ1-3'                                        |
| RC2                                                        |      | 5'-GCCAAAAGACGGAAAAAGGAGCCGAAAAAGCGGAAAAAGA-3'                                           |
| R63-                                                       | G7T2 | 5'-phos-<br>GCTCCTTTTTCCGCTTTTTGGCACTTTTTT <b>CGCAGAGCC</b> TTACGTTTTTTGCCAGTTTTTG-3'    |
|                                                            | G9   | 5'-phos-<br>GCTCCTTTTTCCGCTTTTTGGCACTTTTTT <b>CGCCGGGCC</b> TTACGTTTTTTGCCAGTTTTTG-3'    |
|                                                            | G5T5 | 5'-phos-<br>GCTCCTTTTTCCGCTTTTTGGCACTTTTTT <b>AAAAGCGCC</b> TTACGTTTTTTGCCAGTTTTTG-3'    |
|                                                            | G7T3 | 5'-phos-<br>GCTCCTTTTTCCGCTTTTTGGCACTTTTTT <b>CTGTGCTC</b> TTACGTTTTTTGCCAGTTTTTG-3'     |
| Ring B                                                     |      |                                                                                          |
| rm-1                                                       |      | 5'-GGTTTGTAAGACGGAATAATGTAGAATATATCCATACAGTTCTAAGGTCA-3'                                 |
| FAM-rm2                                                    |      | 5'-Fam-AGTGAATGCAGCTAGAAAGAATCAAGATCATAGTCAATCTCTCAGAGACGT-3'                            |
| HEX-rm2<br>(substitute to<br>FAM-rm2 to label<br>with HEX) |      | 5'-HEX-AGTGAATGCAGCTAGAAAGAATCAAGATCATAGTCAATCTCTCAGAGACGT-3'                            |
| R1RM-                                                      | G7T2 | 5'-phos-<br>TTCTTTCTAGCTGCATTCCACTT <b>GGCTCTGCG</b> TTGACCTTAGAACTGTATGGATATATTCTAC-3'  |
|                                                            | G9   | 5'-phos-<br>TTCTTTCTAGCTGCATTCCACTT <b>GGCCCGGCG</b> TTGACCTTAGAACTGTATGGATATATTCTAC-3'  |
|                                                            | G5T5 | 5'-phos-<br>TTCTTTCTAGCTGCATTCCACTT <b>GGCGCTTTTT</b> TTGACCTTAGAACTGTATGGATATATTCTAC-3' |
|                                                            | G7T3 | 5'-phos-<br>TTCTTTCTAGCTGCATTCCACTT <b>GAGCAGCAGG</b> TGACCTTAGAACTGTATGGATATATTCTAC-3'  |
| RMR2-                                                      | G7T2 | 5'-phos-<br>ATTATCCGTCTTACAAACCTAT <b>GGCGCTTTTT</b> TCGTCTCTGAGAGATTGACTATGATCTTGA-3'   |
|                                                            | G9   | 5'-phos-<br>ATTATCCGTCTTACAAACCTAT <b>GGCGCTTTTT</b> TCGTCTCTGAGAGATTGACTATGATCTTGA-3'   |
|                                                            | G5T5 | 5'-phos-<br>ATTATCCGTCTTACAAACCTAT <b>GGCCGGCGT</b> TACGTCTCTGAGAGATTGACTATGATCTTGA-3'   |
|                                                            | G7T3 | 5'-phos-<br>ATTATCCGTCTTACAAACCTAT <b>GGCCGGCGT</b> TACGTCTCTGAGAGATTGACTATGATCTTGA-3'   |

**Table S4.** Sequences of ODNs used for Ring A and Ring B. The sequences of ss-region a1 are colored in red, and the sequences of ss-region b1 are colored in blue. The sequences of ss-region b2 are colored in green.

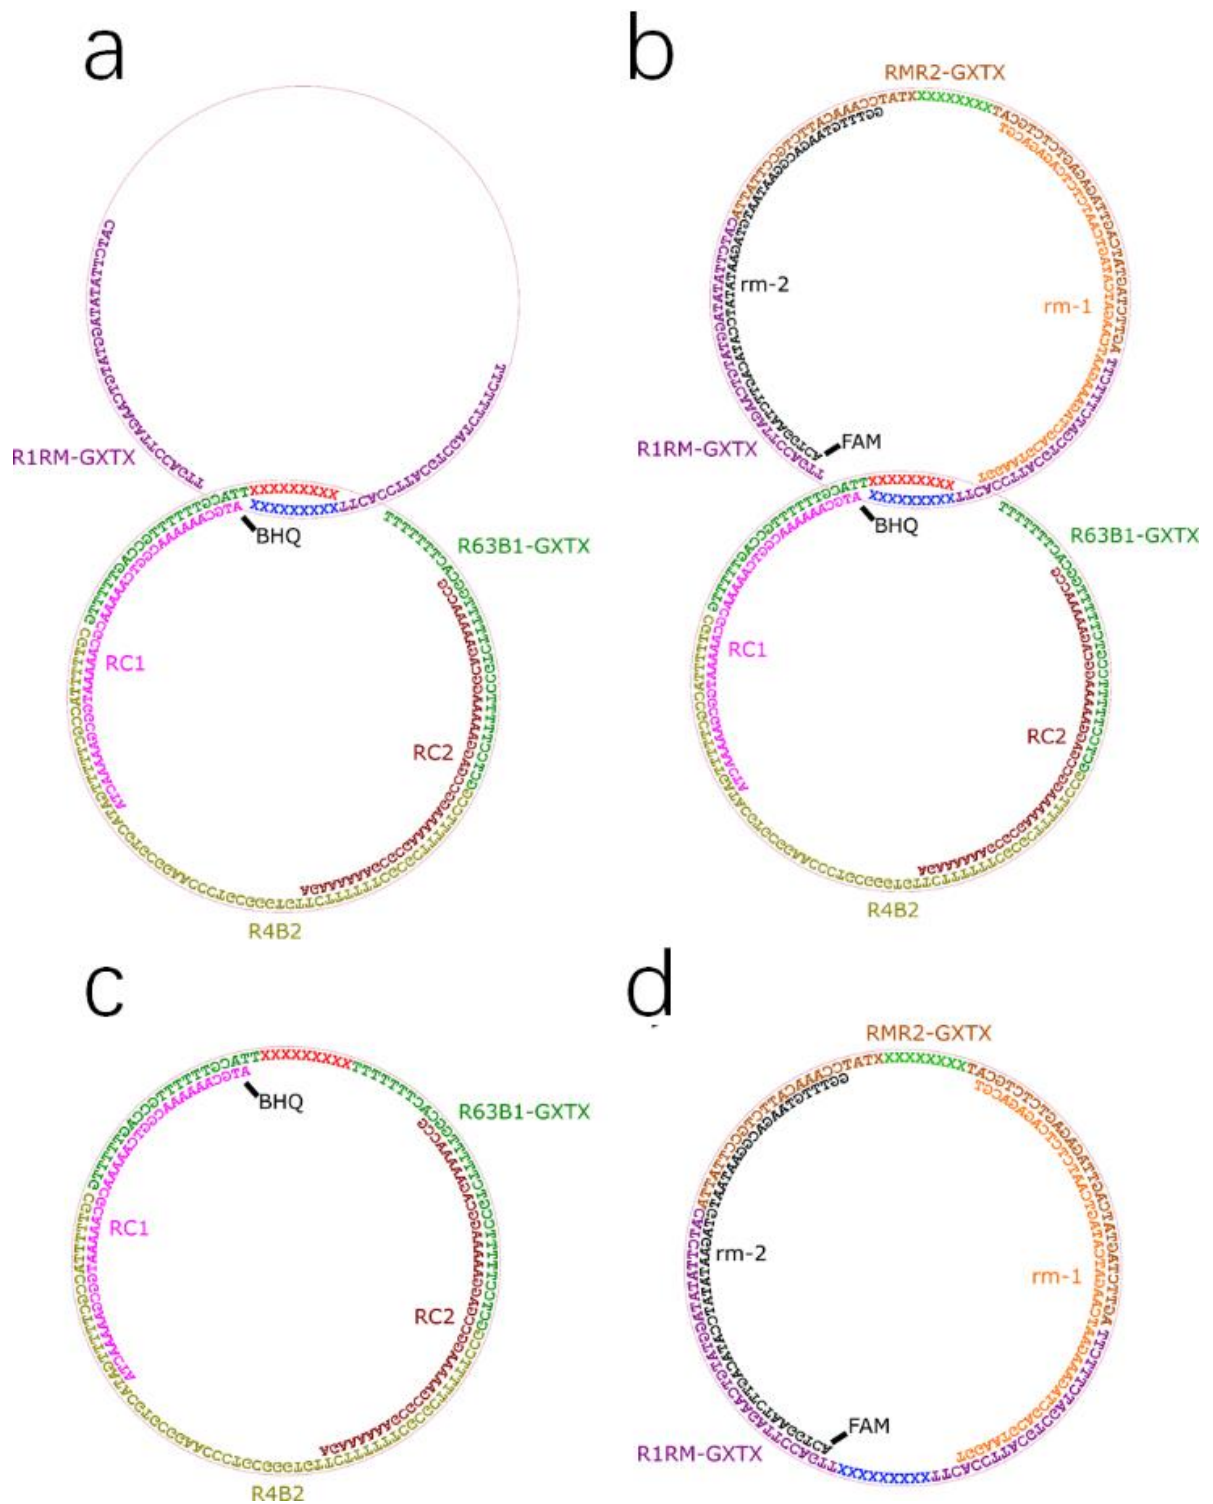

**Figure S1.** ODNs used for the threaded Ring A,  $Cat^{hyb}$ , Ring A and Ring B. (a) Structure of the threaded Ring A; (b) Structure of  $Cat^{hyb}$ ; (c) Structure of Ring A; (d) Structure of Ring B. The sequences of ss-region a1 are shown in red, and the sequences of ss-region b1 are shown in blue. The sequences of ss-region b2 are marked in green.



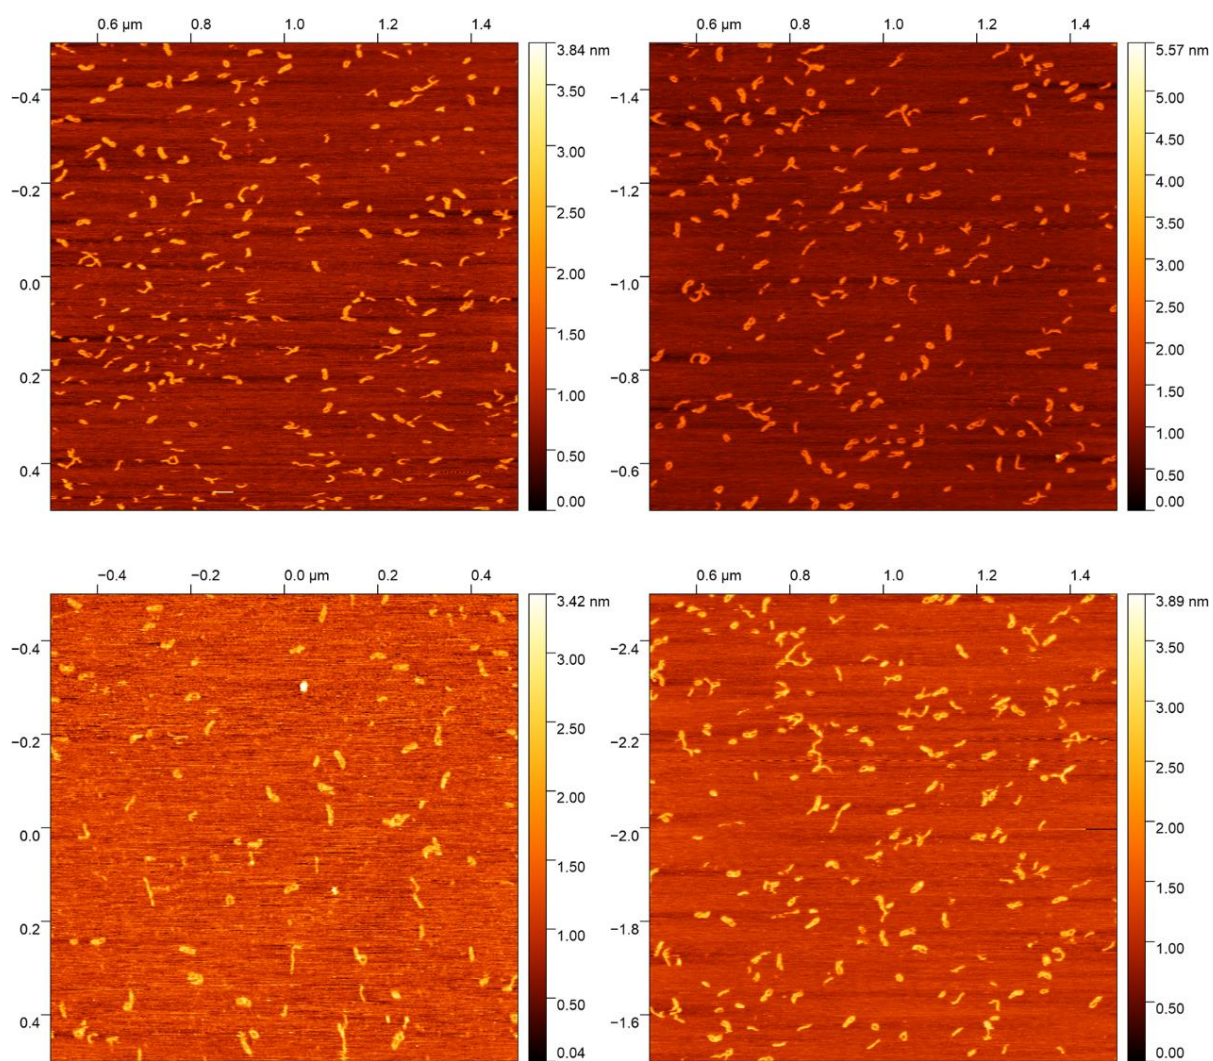

**Figure S2.** AFM images performed in intermitting contact mode in water of the  $\text{Cat}^{\text{hyb}}$ . Image size:  $1 \times 1 \mu\text{m}^2$  with  $512 \times 512$  pixels.

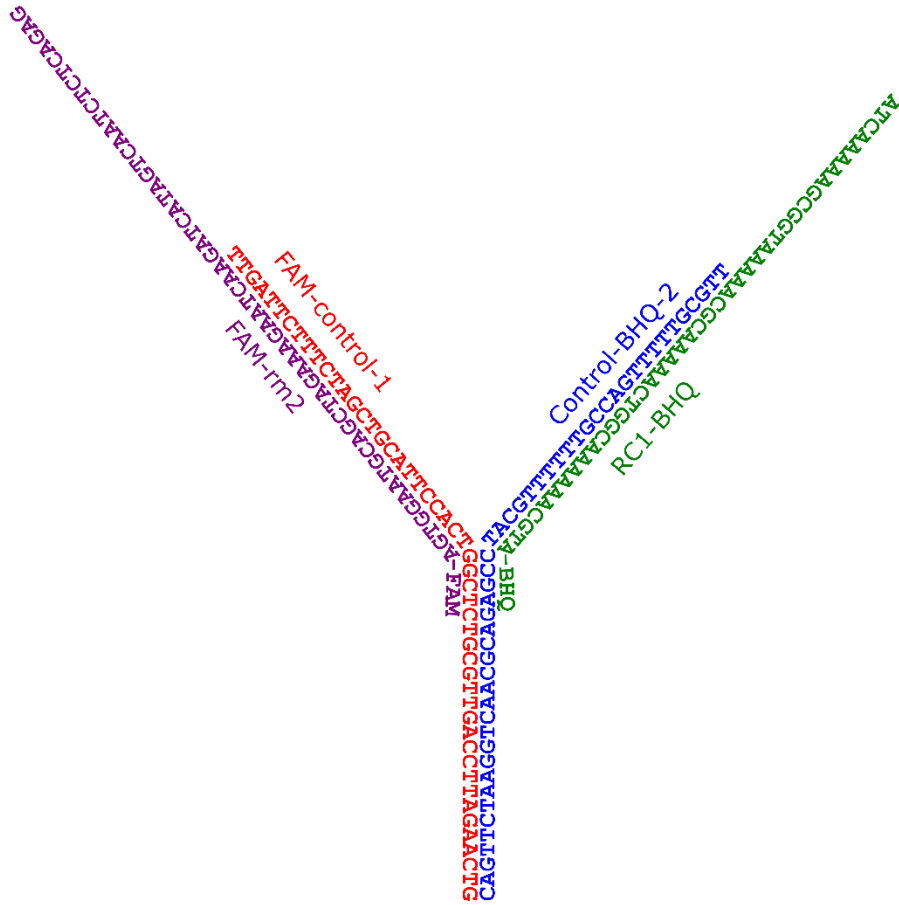

**Figure S3.** ODNs used for the negative control and its structure.

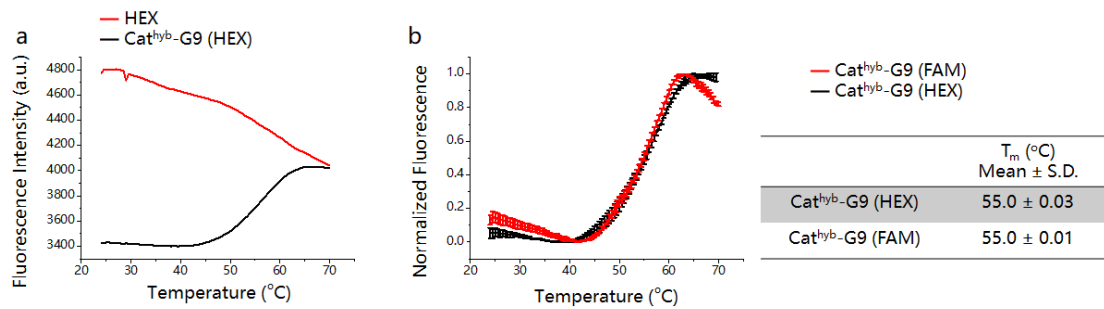

**Figure S4.** Thermal switching from the Cat<sup>hyb</sup>-G9 to the Cat<sup>mec</sup>-G9. (a) temperature-dependent fluorescence intensity of 20  $\mu$ L of 100 nM DNA ring labeled with HEX (red) and 20  $\mu$ L of 100 nM Cat<sup>hyb</sup>-G9 labeled with HEX and BHQ2 (black) in DC buffer; (b) temperature-dependent fluorescence intensity of 20  $\mu$ L of 100 nM Cat<sup>hyb</sup>-G9 labeled with FAM (red) and 20  $\mu$ L of 100 nM Cat<sup>hyb</sup>-G9 labeled with HEX (black) (S.D., n = 3).

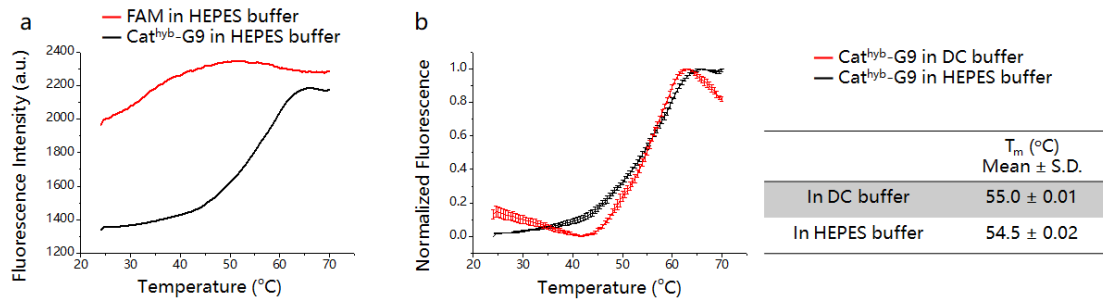

**Figure S5.** Thermal switching between the Cat<sup>hyb</sup>-G9 and the Cat<sup>mec</sup>-G9 in the HEPES buffer (10 mM, EDTA 1 mM, MgCl<sub>2</sub> 25 mM pH=8). (a) temperature-dependent fluorescence intensity of 20  $\mu$ L of 100 nM DNA ring labeled with 6-FAM (red) and 20  $\mu$ L of 100 nM Cat<sup>hyb</sup>-G9 labeled with FAM and BHQ1 (black) in HEPES buffer; (b) temperature-dependent fluorescence intensity of 20  $\mu$ L of 100 nM Cat<sup>hyb</sup>-G9 in DC buffer (red) and HEPES buffer (black) (S.D., n = 3).

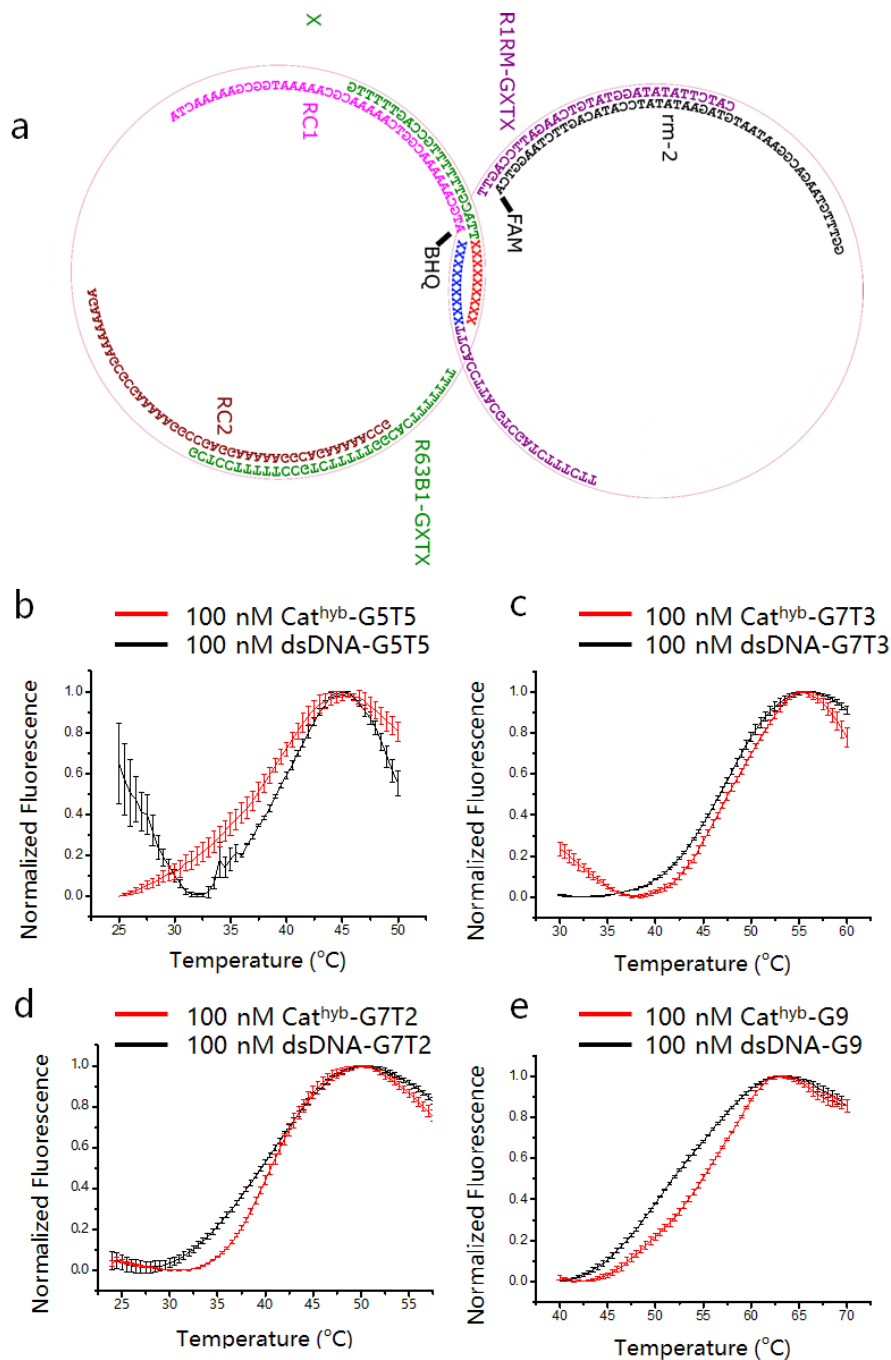

**Figure S6.** (a) ODNs used for measuring  $T_m$  of dsDNA with different HR; (b-e) Melting curves of the  $Cat^{hyb}$ s and dsDNA with different HR; (b) 100 nM of the  $Cat^{hyb}$ -G5T5 (red) and dsDNA-G5T5 (black) (S.D.,  $n = 3$ ); (c) 100 nM of the  $Cat^{hyb}$ -G7T3 (red) and dsDNA-G7T3 (black) (S.D.,  $n = 3$ ); (d) 100 nM of the  $Cat^{hyb}$ -G7T2 (red) and dsDNA-G7T2 (black) (S.D.,  $n = 3$ ); (e) 100 nM of the  $Cat^{hyb}$ -G9 (red) and dsDNA-G9 (black) (S.D.,  $n = 3$ ).

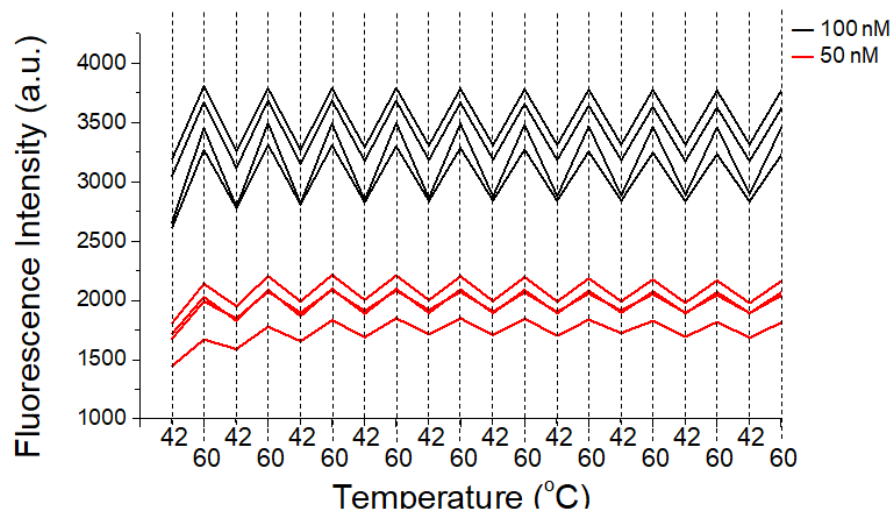

**Figure S7.** Fluorescence intensity of Cat<sup>hyb</sup>-G9 with different concentrations at 42 °C and 60 °C. Black: 100 nM, red: 50 nM.
